# Supplementary material
Source: publisher figshare collection journal article supplement (https://tandf.figshare.com/ndownloader/files/14398109)
Supplement: Supplementary file 1 [file 14398109]

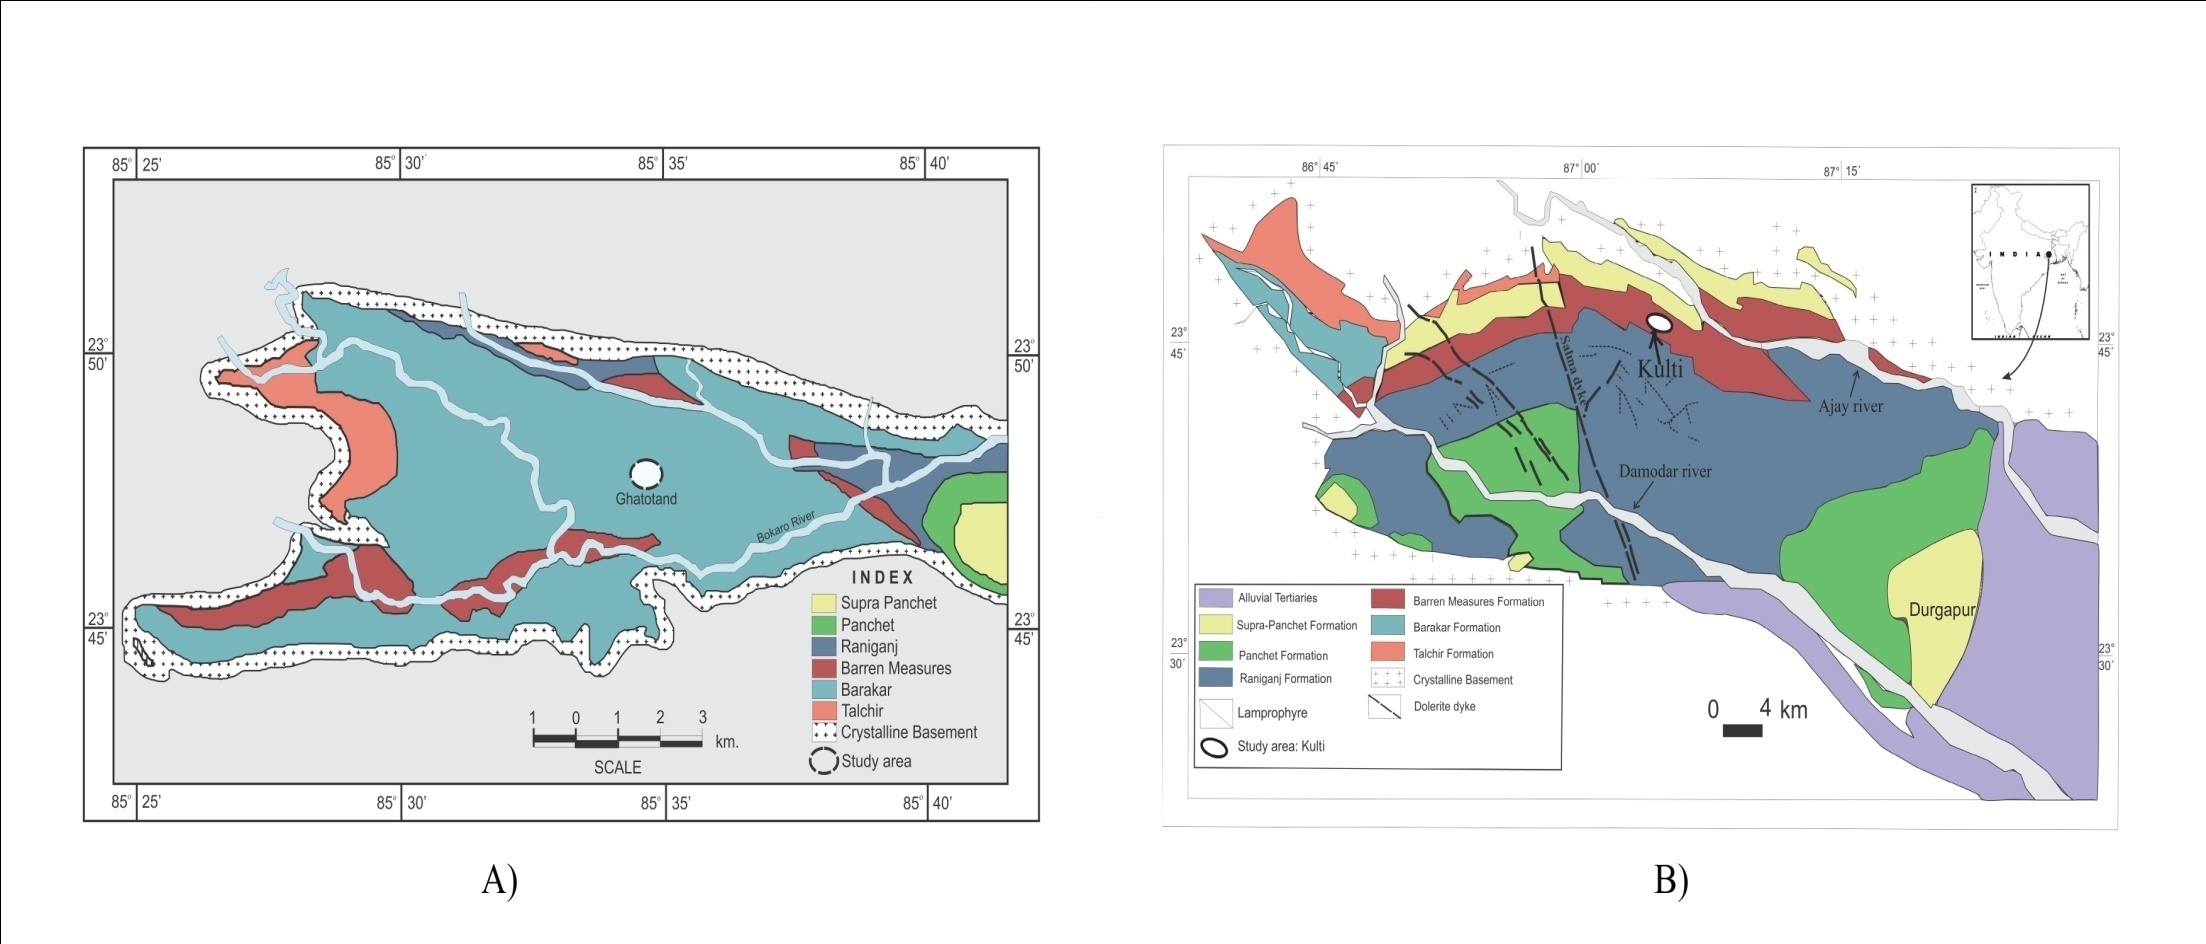


***Supplementary Figure 1: Geological maps of West Bokaro (1A) and Raniganj (1B) basins, India***

***Supplementary Figure 2: Pore size distribution (PSD) calculated using nitrogen-gas adsorption and desorption isotherm data utilizing BJH model for sample SWB1.***
